# Supplementary material
Source: publisher site journal article supplement (https://www.spandidos-publications.com/4084/downloadSupplementary)

Figure S1. Cellular component Gene Ontology functions enriched by top differentially expressed long non-coding RNAs.

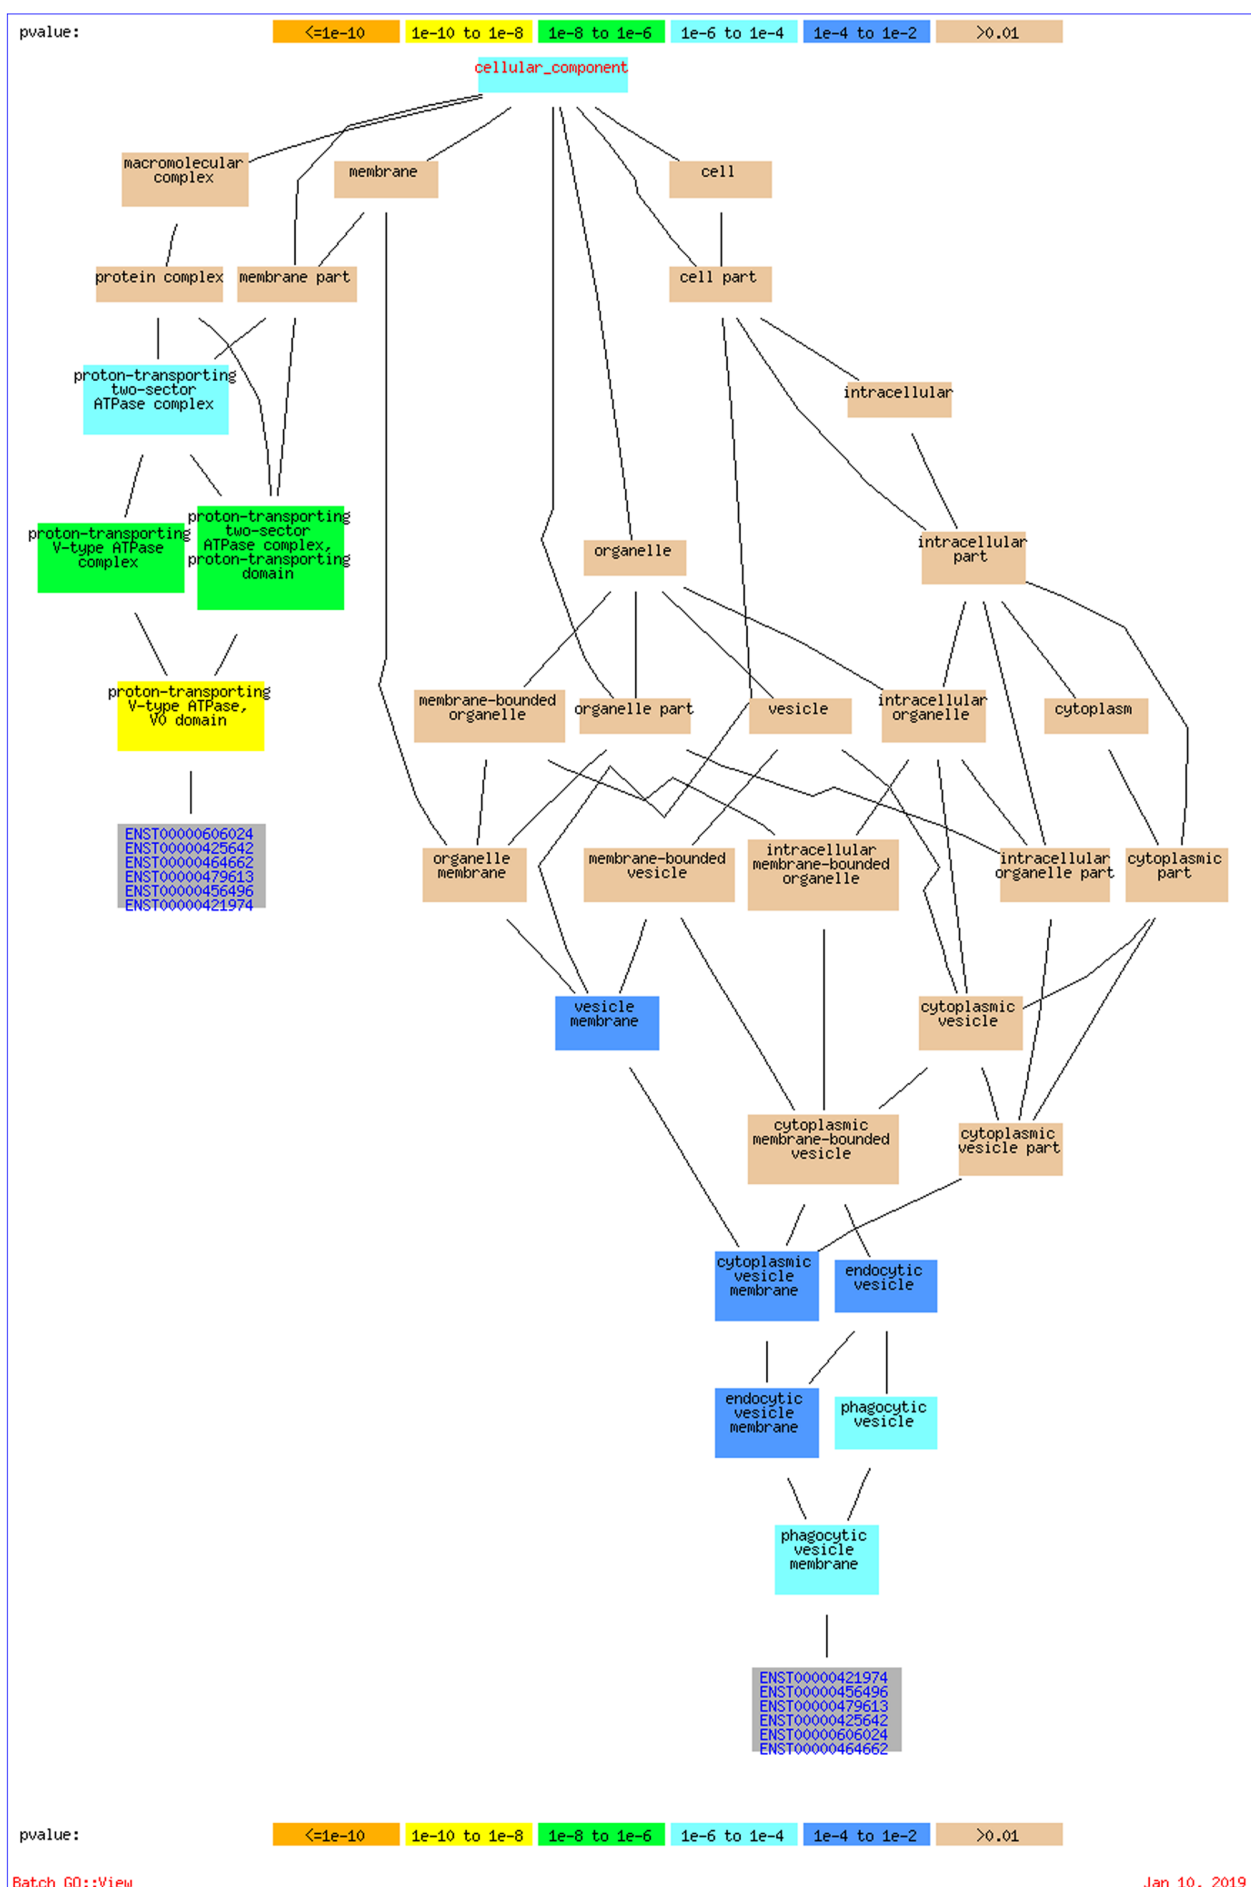

Supplement: Supplementary file 1 [file downloadSupplementary]
